# Supplementary material for: Self-Medication with Drotaverine among Patients with Common Abdominal Symptoms and Treatment Efficacy from the Perspectives of Patients and General Practitioners—An Observational, Retrospective, Cross-Sectional Study Using Real-World Data
Source: MDPI journal article supplement (doi:10.3390/jcm11113156), 2022-06-01
Supplement: s1 [file s1]

Supplemental Table S1. Sample characteristics and impact of drotaverine

|                                                                      |       |
|----------------------------------------------------------------------|-------|
|                                                                      | N=650 |
| Mean age±standard deviation (years)                                  | 43±14 |
| Women, %                                                             | 88%   |
| Body-mass index, %                                                   |       |
| <18.5                                                                | 4%    |
| 18.5–24.9                                                            | 58%   |
| 25–29.9                                                              | 29%   |
| >30                                                                  | 9%    |
| Education, %                                                         |       |
| tertiary education                                                   | 57%   |
| secondary education                                                  | 28%   |
| post-secondary                                                       | 9%    |
| vocational                                                           | 5%    |
| lower secondary or primary                                           | 2%    |
| Patients purchasing drotaverine without physician's advice, %        | 83%   |
| Type of drotaverine purchase, %                                      |       |
| first-time                                                           | 9%    |
| re-purchase                                                          | 91%   |
| Sources of information on drotaverine among first-time purchasers, % |       |
| pharmacists                                                          | 43%   |
| friends or relatives                                                 | 35%   |
| physicians                                                           | 20%   |
| TV advertisements                                                    | 18%   |
| a known drug (a healthcare professional)                             | 3%    |
| radio advertisements                                                 | 2%    |
| Sources of information on drotaverine among re-purchasers, %         |       |
| family and friends                                                   | 44%   |
| pharmacists                                                          | 30%   |
| physicians                                                           | 26%   |
| TV advertisements                                                    | 28%   |
| experience with the drug / brand used for a long time                | 6%    |
| radio advertisements                                                 | 2%    |
| advertising (general)                                                | 1%    |
| search engine / the internet                                         | 1%    |
| cannot remember / hard to say                                        | 3%    |
| Initial drotaverine dose, %                                          |       |
| 40 mg                                                                | 30%   |
| 80 mg                                                                | 58%   |
| 160 mg                                                               | 11%   |
| other                                                                | 1%    |
| Perceived onset of action of drotaverine, %                          |       |
| <15 min                                                              | 8%    |
| 16–30 min                                                            | 53%   |
| 31–60 min                                                            | 32%   |
| >60 min                                                              | 8%    |
| Perceived speed of action of drotaverine, %                          |       |
| very fast                                                            | 15%   |
| rather fast                                                          | 78%   |
| rather slow                                                          | 5%    |
| slow                                                                 | 1%    |

|                                                                 |     |
|-----------------------------------------------------------------|-----|
| Duration of symptom relief after drotaverine, %                 |     |
| The symptoms disappeared completely after taking the first dose | 25% |
| <4 h                                                            | 26% |
| <8 h                                                            | 24% |
| <12h                                                            | 16% |
| <24 h                                                           | 9%  |
| Overall pharmacological effect of drotaverine, %                |     |
| excellent                                                       | 31% |
| good                                                            | 55% |
| sufficient                                                      | 13% |
| not good                                                        | 1%  |
| poor                                                            | 1%  |
| Treatment satisfaction with drotaverine, %                      |     |
| very satisfied                                                  | 42% |
| satisfied                                                       | 56% |
| rather dissatisfied                                             | 1%  |
| dissatisfied                                                    | 1%  |
| Impact of drotaverine on daily activities, %                    |     |
| positive                                                        | 62% |
| rather positive                                                 | 9%  |
| absent                                                          | 29% |
| negative or rather negative                                     | <1% |
| Impact of drotaverine on physical activity, %                   |     |
| positive                                                        | 50% |
| rather positive                                                 | 8%  |
| absent                                                          | 42% |
| negative or rather negative                                     | <1% |
| Impact of drotaverine on emotional condition, %                 |     |
| positive                                                        | 29% |
| rather positive                                                 | 6%  |
| absent                                                          | 64% |
| negative or rather negative                                     | <1% |
